# Supplementary material for: ZBP1 promotes inflammatory responses downstream of TLR3/TLR4 via timely delivery of RIPK1 to TRIF
Source: PubMed Central journal article supplement — Proc Natl Acad Sci U S A. 2022 Jun 6;119(24):e2113872119. doi: 10.1073/pnas.2113872119 (PMC9214535; doi:10.1073/pnas.2113872119), 2022-06-06
Supplement: pnas.2113872119.sapp.pdf [file pnas.2113872119.sapp.pdf]

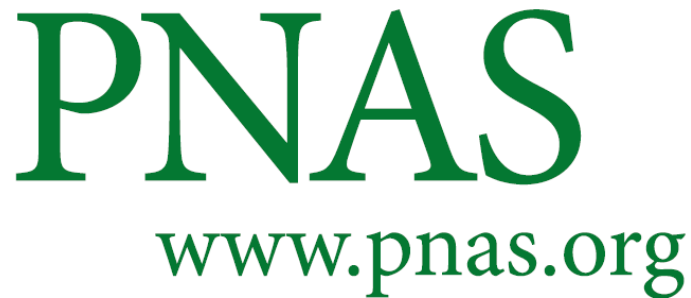

## **Supplementary Information for**

### **ZBP1 Promotes Inflammatory Responses downstream of TLR3/TLR4 via Timely Delivery of RIPK1 to TRIF**

Hayley I. Muendlein<sup>1</sup>, Wilson M. Connolly<sup>1</sup>, Zoie Magri<sup>2</sup>, David Jetton<sup>2</sup>, Irina Smirnova<sup>1</sup>, Alexei Degterev<sup>3</sup>, Siddharth Balachandran<sup>4</sup>, Alexander Poltorak<sup>\*1,2</sup>

#### **Affiliations:**

<sup>1</sup> Department of Immunology, Tufts University School of Medicine, Boston, MA 02111, USA

<sup>2</sup> Graduate Program in Immunology, Tufts Graduate School of Biomedical Sciences, Boston, MA 02111, USA

<sup>3</sup>Department of Developmental, Molecular and Chemical Biology, Tufts University School of Medicine, Boston, MA 02111, USA

<sup>4</sup> Blood Cell Development and Function Program, Fox Chase Cancer Center, Philadelphia, PA 19111, USA.

\*Correspondence to:  
Alexander Poltorak, Department of Immunology  
M&V 702 136 Harrison Avenue  
Boston, MA 02111  
[Alexander.poltorak@tufts.edu](mailto:Alexander.poltorak@tufts.edu)

#### **This PDF file includes:**

Figures S1 and S2

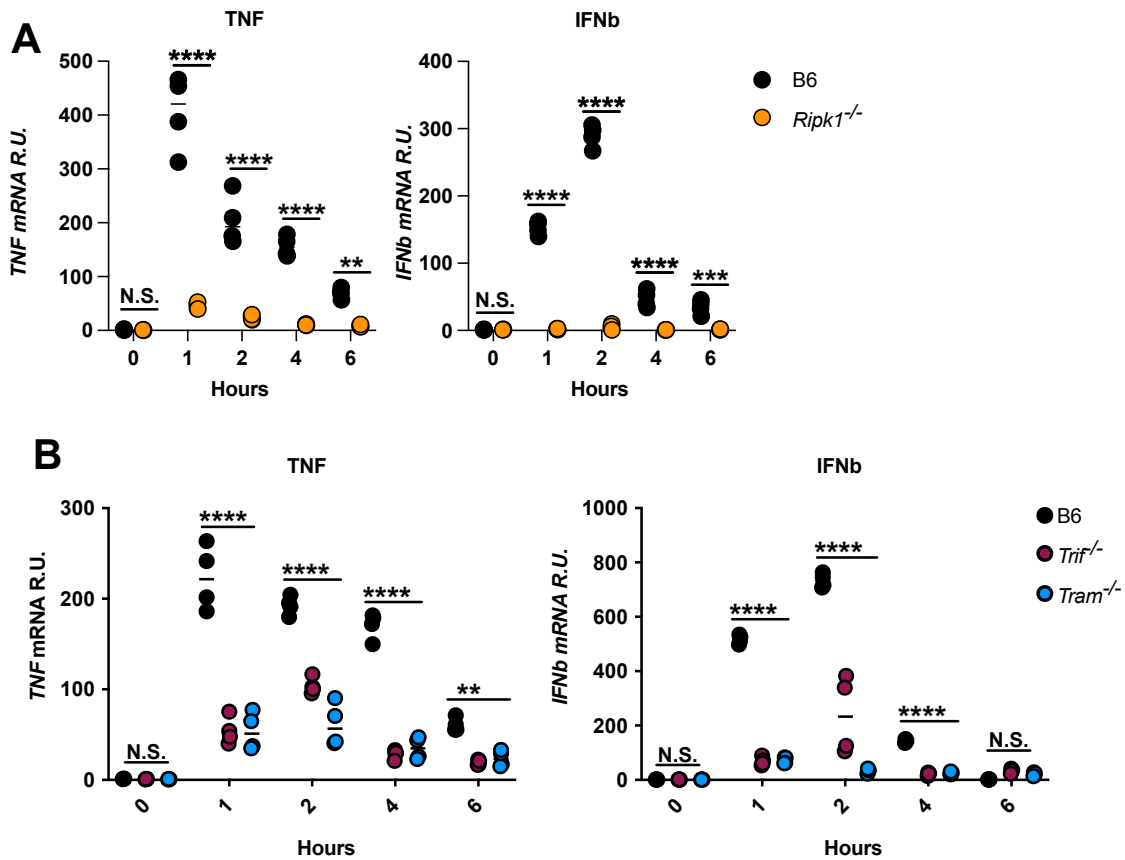

**Fig. S1.** (A) Relative TNF and IFN $\beta$  mRNA levels, normalized to GAPDH in B6 and *Ripk1*<sup>-/-</sup> mouse fetal liver macrophages stimulated with LPS for indicated time points. (B) Relative TNF and IFN $\beta$  mRNA levels, normalized to GAPDH in B6 and *Trif*<sup>-/-</sup> and *Tram*<sup>-/-</sup> macrophages stimulated with LPS for indicated time points. For experiments with mouse fetal liver macrophages, data points indicate the mean from triplicate wells of 4 technically independent experiments. For experiments with BMDMs, data points indicate the mean from triplicate wells of 4 biologically independent experiments. Analysis of variance (ANOVA) was used for comparison between groups: ns, nonsignificant ( $P > 0.05$ ); \* $P < 0.05$ ; \*\* $P < 0.01$ ; \*\*\* $P < 0.001$ ; \*\*\*\* $P < 0.0001$ .

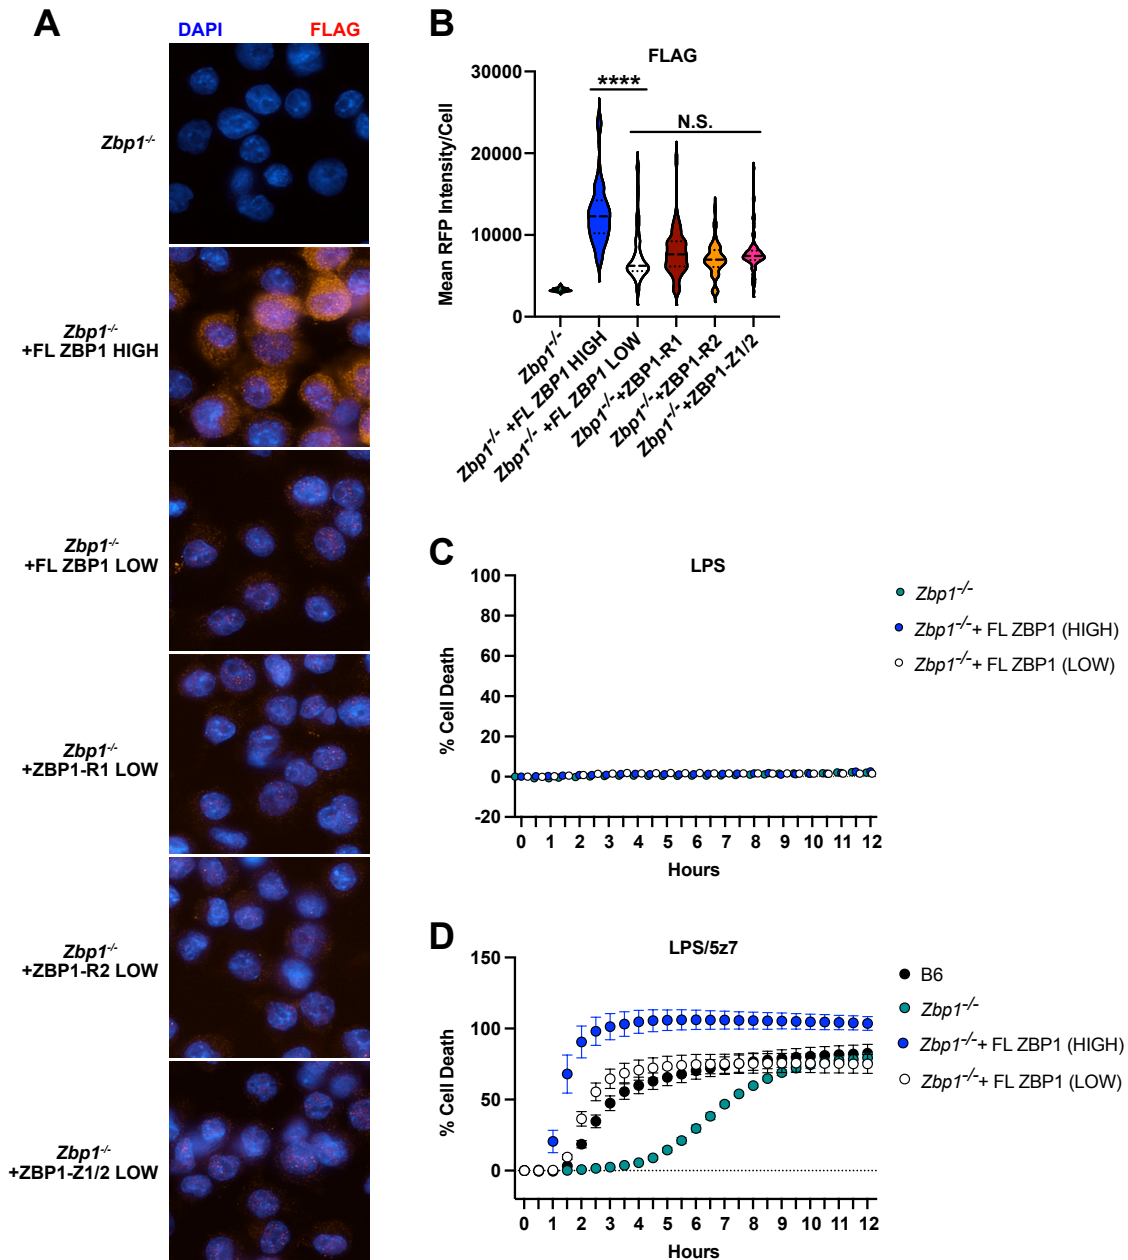

**Fig. S2.** (A) Representative 60X images of FLAG-ZBP1 staining in B6, *Zbp1*<sup>-/-</sup>, and *Zbp1*<sup>-/-</sup> macrophages reconstituted with low or high levels of ZBP1 or with mutant ZBP1 constructs lacking RHIM1 (ZBP1-R1), RHIM2 (ZBP1-R2) or both Za domains. (B) Quantification of mean FLAG-ZBP1 signal intensity/cell as indicated. n=100 cells/group imaged across 4-5 fields of view. (C, D) Cell death as measured by propidium iodide incorporation in indicated cells stimulated with (C) LPS or (D) LPS/5z7. Data from cell death assays and imaging experiments are representative of 3 or more independent experiments. Analysis of variance (ANOVA) was used for comparison between groups: ns, nonsignificant (P>0.05); \*P<0.05; \*\*P<0.01; \*\*\*P<0.001; \*\*\*\*P<0.0001.
